# Supplementary material for: A Plantar Pressure Sensing System with Balancing Sensitivity Based on Tailored MWCNTs/PDMS Composites
Source: MDPI journal article supplement (doi:10.3390/mi9090466), 2018-09-13
Supplement: s1 [file s1]

# Supplementary Materials: A Plantar Pressure Sensing System with Balancing Sensitivity Based on Tailored MWCNTs/PDMS Composites

Xuefeng Zhang \*, Running Chai, Haitao Wang and Xiangdong Ye

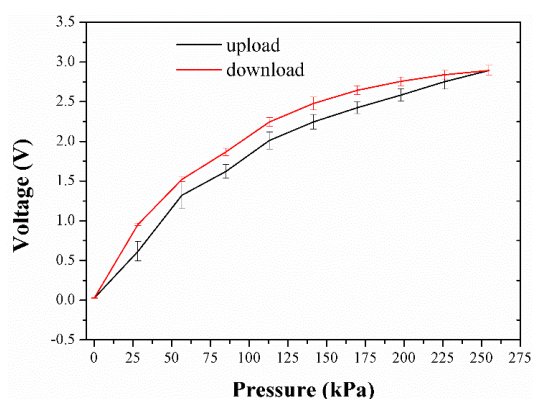

Element 1

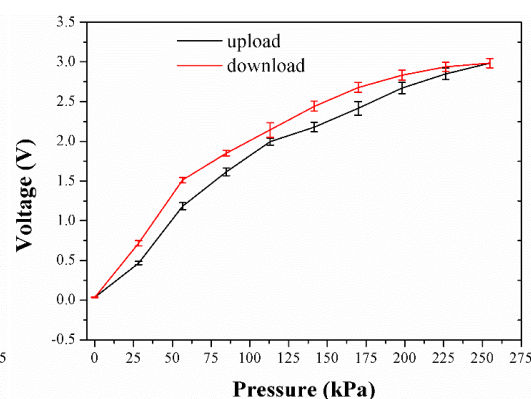

Element 2

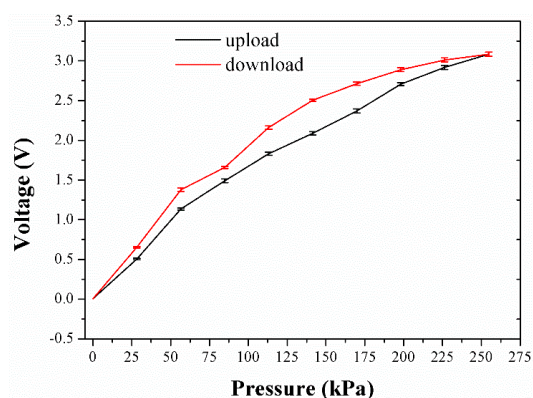

Element 3

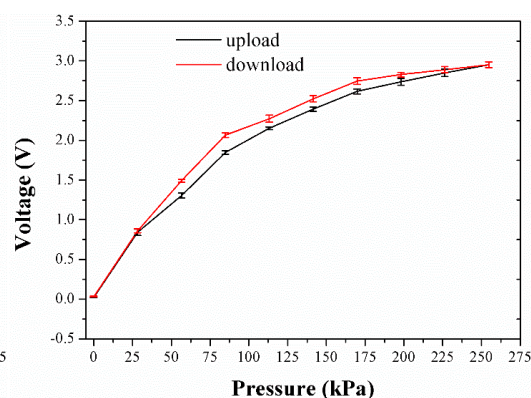

Element 4

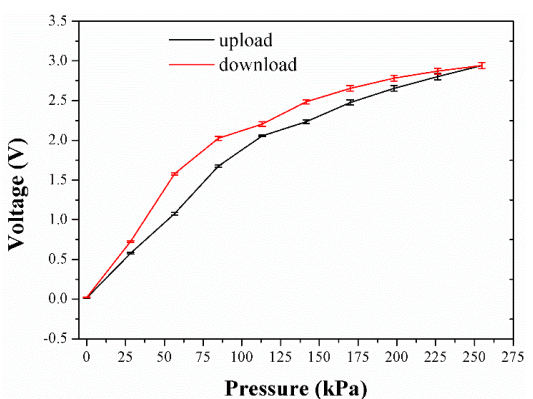

Element 5

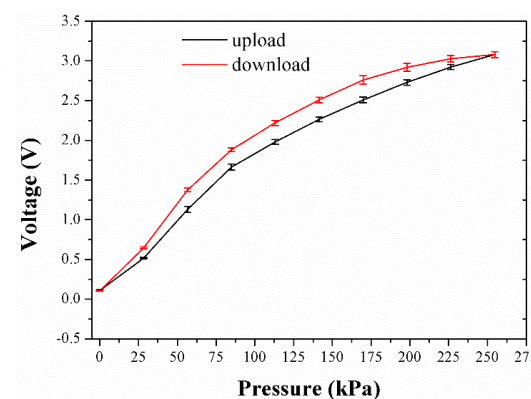

Element 6

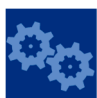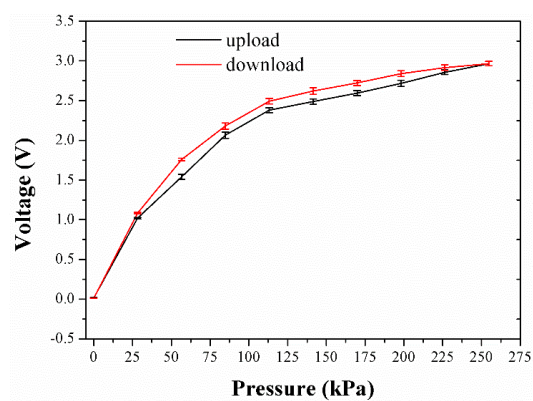

Element 7

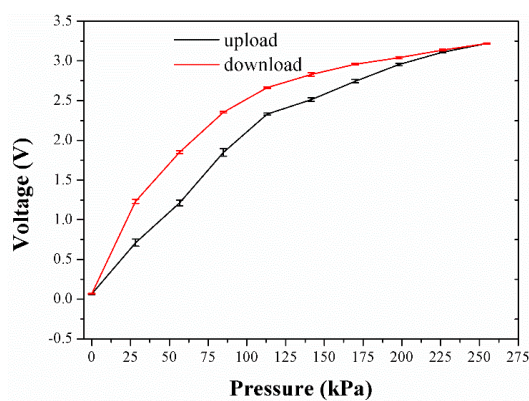

Element 8

Figure S1. Calibration curves for all the sensing elements.
